# Supplementary material
Source: PubMed Central journal article supplement (PMC2660626)
Supplement: tpc.108.064071_1.pdf [file tpc.108.064071_1.pdf]

**Supplemental Figure 1.** Tendril-less leaf phenotype of allele *tl-pet*.

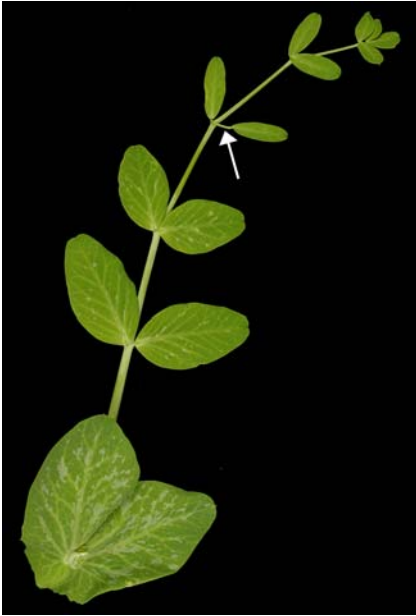

Arrow marks an extended petiolule supporting a narrow leaflet.

## Supplemental Figure 2 ClustalW2 sequence alignment used to estimate tree in Figure 3.

```

*          20          *          40          *          60          *          80
CR962121_7 : -----MN----HQDQMMLMSQLFPAC-----EYTQIIS-----QQGEKK : 30
CR962121_5 : -----MN----HQDQMMLMSQLFPAC-----EYTQIIS-----QQGEKK : 30
At4g36740 : -----MN--YTVDDQNMAFISQLYPD-----VYTQIV-----QPGEVK : 31
At2g18550 : -----MNNQNVDDHNLILLISQLYPN-----VYTPLVPQ-----QGGEAK : 34
At5g66700 : -----MDHGRLMDDQMMLGSQVYPYTTQPQNSHCIIVNQ-----IDGSEE : 40
Tl_Pisum : -----MDWNTDSTVFPFVP-----PPGSSLS-----FFYNNYNNYNS : 31
Tl_Lens_cu : -----MDWNTDSTVFPFVP-----PPGSSLS-----FFYNNYNNYNS : 31
Tl_Lathyrus : -----MDWNNERAVFPFVP-----PPASSLS-----FFYNNYNNYNS : 31
Tl_Vicia_n : -----MDWNTDSTVFPFVP-----PPGSSLS-----FFYNNYNNYNS : 31
Tl_Vicia_s : -----MDWNTDSTVFPFVP-----PPGSSLS-----FFYNNYNDYS : 31
AC139525_2 : -----MEWNGN--TRSFVP-----QPESLS-----FLYNNYQCSYQ : 30
At5g03790 : -----MEWSTTSNVENVRVAFMPPWPPESSSFN-----SLHSFNFDPYA : 39
At2g36610 : -----MEYWSSSFIDGA-----SSSFI-----SPF--YNFDHFS : 28
At2g46680 : -----MTEGGE--YSPAMSAEPFLTMKK-----IDGSEE : 22
At3g61890 : -----MEEGDF--FNCCFSEISSGMTMKN-----IDGSEE : 22
AC174358_2 : -----MEYSQYSSYSAEAGEEETYTSSSI-----IDGSEE : 24
At1g27050 : -----MENSDTDSEVFFVFNQNNHSHKFPSSCFPPS-----SHSAFYGSSSMI : 45
At5g53980 : -----MENS-----QSQGN-----IDGSEE : 10
AC145165_1 : -----MKRLNNTSDSFSTPLITISP--STEEHSPRNK-----HVGMEFQ : 38
TC106805 : -----MKRLG--SSDSL--ALMTICP--TTEESPRNN-----QVYGEFQ : 36
CU024864_1 : -----MKRFN--NSTMA--SLLSMYQ--SKEVDVDQRNE-----A--KGYSEEFQ : 38
At4g40060 : -----MKR--LSSSDSMC--GLIS--TSTDEQSPR-----GYG--SNYQ : 31
At2g22430 : -----MMKR--LSSSDSVG--GLISLCP--TSTDEQSPR-----RYGGEFQ : 37
At5g65310 : -----MKRSRGSSDSL--GFLPIRHSTTDKQISPRPTT-----TGFLYSGAGDYS : 44
At1g69780 : -----MCSNN--GMSFFPSNFMIQFTSYEDDHPHQSPSLAPLLPSCSLPQDLHGFA--SFL : 51
At1g26960 : -----MCSNNGLAFFPENFSLQNHQEEEDH-----PQLLQDFH--GFL : 38
CT571261_1 : -----MHEMAFFQANFMLQTPHHHDDHHQPSLSL-----SILPQDYHGGP--SFL : 43
AC136974_2 : -----MAFPFPHSFMFNPHEDHDQLPSTSLN--TFPSFPQHFOQA--PFL : 43
TC103795 : -----MKIIIMKTYFLLQQLLLPILPFLIN--TFKGSNS--GGA--SFM : 40
At5g15150 : -----MYMYEEERNININNOEGLRLEMAFPQHGFMFQQLHEDNAHHLPSPTS--LPSCPHLFYGGGNYM : 64
At3g01220 : -----MYVFD-----TTEAGLRLEMAFPQHGFMFQQLHEDNSQDQ-----LPSCPHLFNGGG--NYM : 52
CR954197_2 : -----MAGGKLFGGS-----NMSLLLQNERLP-----CTSEVLESWVHTPASQ : 40
TC100666 : -----MAGGRVFSNGPANISNINMILLQNNQQTPRGN--SSQPLDSLFLSSSAFF : 51
TC94592 : -----MESGRLYFDSSACRGNMNMFLGN-----ADLGRF-- : 32
At3g01470 : -----MESNSFFFDPSASHGN--SMFFLGN-----LNPVVQGG : 31
At4g37790 : MGLDDSCNTGLVLGLSPTPNYNAIKKSSSTVDHRFIRLDPSLTLSSLGESYIKTGAGAGDQICRQTSSHSGISSES : 81
m

*          100          *          120          *          140          *          160
CR962121_7 : PK---PRRKRK--NKGGENSANDMKNKRKLSDEQVNIILEENFGNEHKLSEK--- : 79
CR962121_5 : PK---PRRKRK--NKGGENSANDMKNKRKLSDEQVNIILEENFGNEHKLSEK--- : 79
At4g36740 : QP---KRRRKKTKGS---VASADG---GNGLFRKRKLTDEQVNMLEMSFGDEHKLSEK--- : 81
At2g18550 : PT---RRRKRKSKSV---VVAEGENEGNGWFRKRKLTDEQVRLMELISFEDDHLSEK--- : 87
At5g66700 : SKPVKRRRKRKSKGSS---ATNEEDVAEIGGMLRKRKLTDEQVNMLEYSFNGNEHKLSEK--- : 97
Tl_Pisum : GIERSEALGETQQR-----LLPVIDDETINKINNGKDHREKKTKTKNKLTSNQVDALERSFHEEIKLDEP--- : 99
Tl_Lens_cu : GIERSEALGETQQR-----LLPAIDDETINKINNGKDHREKKTKTKNKLTSNQVDALERSFHEEIKLDEP--- : 99
Tl_Lathyrus : GIEAGEAALGETQQR-----LLPVIDDETINKINNGKDKCQKKKSKKNKLTSNQVDALERSFHEEIKLDEP--- : 99
Tl_Vicia_n : GIEASEGALGETQQR-----LLPVIDDDPNKINNGKDNREKKAKNKKNKLTSNQVDALERSFHEEIKLDEP--- : 99
Tl_Vicia_s : GIEASEGALAETQQR-----LLPVIDDDPNKINNGKDHREKKAKNKKNKLTSNQVDALERSFHEEIKLDEP--- : 99
AC139525_2 : GM--MEVKHQDWDTD-----MFPPEMK--MMKYG--NQEKK---RLTSEQMESLESSFOEIKLDEP--- : 85
At5g03790 : GNSYTPG--DTQTGP-----VISVPESEKIMNAYRFPNN--NNEMIKKRLTSGQLASLERSFOEIKLDSR--- : 103
At2g36610 : GNQDNRLCLGTMGAQQ-----DILHVP--LAMVESGYGEEESNSFNGQEKKKKMTSEQLKFLERSFOEIKLNDPRKMK : 100
At2g46680 : -----MKKSNHNKNQRRFSDEQIKSLEMMFSETRLEPRK--- : 58
At3g61890 : -----KMK--KSNQKRFSEEQIKSLELIFESETRLEPRK--- : 56
AC174358_2 : -----SSMRKKKNKNTKRFDEQIKSLETMFETTRLEPRK--- : 60
At1g27050 : NTETATMDE-----EDVCESYMMREITKRRKLTPIQLRLLSESFEEKRLDEP--- : 94
At5g53980 : -----KKRRLTQDQVRQLEKCFMTMKNKLEPDL--- : 37
AC145165_1 : SMM-----DGFEED-----GCVEETGHH-----SEKRRRLRVQVKALEKNFEVENKLEPDR--- : 86
TC106805 : SMM-----EGLDEE-----GCVDEPG-----QKRRRLSVDQVKALEKNFEVENKLEPDR--- : 80
CU024864_1 : AML-----DRLEQE-----DSYEDGSPM-----LEKRRRLGYDQVKALEKSFELDNKLEPDR--- : 85
At4g40060 : SML-----EGYDED-----ATLIEEYSGNHHHMLSEKRRRLKVDQVKALEKNFELENKLEPDR--- : 85
At2g22430 : SML-----EGYEEE-----EAAIVEERG--HVGLSEKRRRLSINQVKALEKNFELENKLEPDR--- : 88
At5g65310 : QMF-----DALEDD-----GSLEDLGGVGHASSTAEEKRRRLGVEQVKALEKNFEIDNKLEPDR--- : 98
At1g69780 : GKRSPMEGCCDLETG-----NNMNG--EEDYSDD--GSQMGEKRRRLNMEQVKTLEKNFELENKLEPDR--- : 111
At1g26960 : GKRSPMNVQGFEN-----LDMNG--DEEYSD--GSKMGEKRRRLNMEQLKALEKDFELGNKLESDR--- : 97
CT571261_1 : GKRC--MSFSSGIELG-----EANIPEEDLSD--GSQAGEKRRRLNMEQVKTLEKSFELGNKLEPDR--- : 103
AC136974_2 : LKKS--MSFS--GIENKCHDH-----HEVHGD--DELSDD--GFQSGEKKRRLNLDQVQALEKSFELGNKLEPDR--- : 106

```

TC103795 : MKRS-MSFS-GIESNHINTK-----CDELMHGDEQLSDEEGYSQMGEKKKRLSLEQVKALEKSF EIGNKLEPER--- : 109  
 At5g15150 : MNRS-MSFTGVSDHHLHTQKSPPTTNNMNDQDQVGEEDNLSDDGSHMLGEEKKRLNLEQVRALEKSFELGNKLEPER--- : 141  
 At3g01220 : MNRS-MSLNVGQEDHNQTLT-----EENLSDDGHAHTMLGEEKKRLQLEQVKALEKSFELGNKLEPER--- : 113  
 CR954197\_2 : GSNVSNVNFENGGSN-----RVVTDPRFFQQLKEEENCDEYDEYACVHQGGKKRRLSSEQVQFLEKSF EENKLEPER--- : 113  
 TC100666 : GSRSMVSFEDVQG-----RKRNRNRSFFGGFDLDEN-GEDEMEYFHQSEKKRRLSVDQVQFLEKSF EEDNKLEPER--- : 121  
 TC94592 : --RSMMSMEEGSK-----RRPFFSSP--DELYDEEYEE--QSPEKKRRLTSEQVHMLEKSF EENKLEPER--- : 93  
 At3g01470 : GARSMMNMEETSK-----RRPFFSSP--EDLYDDDFYDD--QLPEKKRRLTTEQVHLLLEKSF ETEENKLEPER--- : 94  
 At4g37790 : SGRVKREREISGGDGE-----EAETTERVVCVSRVSDDDHDEEGVSARKKRLRLTKQQSALLEEDNEKLHSTLNPQK--- : 152

k 4 Q L E F L p

\* 180 \* 200 \* 220 \* 240  
 CR962121\_7 : ----KDRLAMBLGLDPRQVAVVWFQNRARRWKNKKLEEEYFSLKKNHSTILEKCLLETKM-----LKLREQLSEAEKE : 148  
 CR962121\_5 : ----KDRLAMBLGLDPRQVAVVWFQNRARRWKNKKLEEEYFSLKKIHSTILEKCLLETKLREQHSALKLREQLSEAEKE : 155  
 At4g36740 : ----KDRLAABLGLDPRQVAVVWFQNRARRWKNKRL EEEYNKLNKSHDNVVDKCRLESEV-----IQLEKQLYDAERE : 150  
 At2g18550 : ----KDRLASELGLDPRQVAVVWFQNRARRWKNKRVEDEYTKLKNAYETTVEKCRLDSEV-----IHLKLEQLAEARE : 156  
 At5g66700 : ----KEKIAGLGLDPRQVAVVWFQNRARRWKNKKLEEEYAKLNHHDNVRKLVGQCCQLESQI-----LKLTEQLSEQAASE : 166  
 Tl\_Pisum : ----KMKLSABLGLQPRQVAVVWFQNRRTRWKTKQLEHSDYDVLK-----QENQKLEQEVMLKLEKLEKSDC : 161  
 Tl\_Lens\_cu : ----KMKLSABLGLQPRQVAVVWFQNRRTRWKTKQLEHSDYDVLK-----QENQKLEQEVIELKLEKLEKSDG : 161  
 Tl\_Lathyrus : ----KMKLSABLGLQPRQVAVVWFQNRRTRWKTKQLEHSDYDVLK-----QENQKLEQEVMLKLEKLEKSDG : 161  
 Tl\_Vicia\_n : ----KMKLSABLGLQPRQVAVVWFQNRRTRWKTKQLEHSDYDVLK-----QENQKLEQEVMLKLEKLEKADC : 161  
 Tl\_Vicia\_s : ----KMKLSABLGLQPRQVAVVWFQNRRTRWKTKQLEHSDYDVLK-----QENQKLEQEVMTLKEKLEKGDG : 161  
 AC139525\_2 : ----KMKLSABLGLQPRQVAVVWFQNRARRWTKQLEHLYDSL RHQFEVVS-----KEKQQLQDEVMKLEKAMLEKQGSN : 154  
 At5g03790 : ----KVKLSRELGLQPRQVAVVWFQNRARRWAKQLEQLYDSL RQEDYDVS-----REKQMDHDEVKKLRALLRDQGLI : 172  
 At2g36610 : LNPDRKMKLSABLGLQPRQVAVVWFQNRARRWTKQLEHSDYDVLK-----REKELLEQELIQLEKSMLEKADSSC : 174  
 At2g46680 : ----KVQLARELGLQPRQVAVVWFQNRARRWTKQLEHSDYDVLK-----REKELLEQELIQLEKSMLEKADSSC : 174  
 At3g61890 : ----KVQVARELGLQPRQVAVVWFQNRARRWTKQLEHSDYDVLK-----REKELLEQELIQLEKSMLEKADSSC : 174  
 At174358\_2 : ----KLQLAARELGLQPRQVAVVWFQNRARRWTKQLEHSDYDVLK-----REKELLEQELIQLEKSMLEKADSSC : 174  
 AC1g27050 : ----KWLAEKLGLOPSQVAVVWFQNRARRWTKQLEHSDYDVLK-----REKELLEQELIQLEKSMLEKADSSC : 174  
 At5g53980 : ----KLQLSNQLGLQPRQVAVVWFQNRARRWTKQLEHSDYDVLK-----REKELLEQELIQLEKSMLEKADSSC : 174  
 AC145165\_1 : ----KEKLAIBLGLQPRQVAVVWFQNRARRWTKQLEHSDYDVLK-----REKELLEQELIQLEKSMLEKADSSC : 174  
 TC106805 : ----KVKLAQELGLQPRQVAVVWFQNRARRWTKQLEHSDYDVLK-----REKELLEQELIQLEKSMLEKADSSC : 174  
 CU024864\_1 : ----KTKLAQELGLQPRQVAVVWFQNRARRWTKQLEHSDYDVLK-----REKELLEQELIQLEKSMLEKADSSC : 174  
 At4g40060 : ----KTKLAQELGLQPRQVAVVWFQNRARRWTKQLEHSDYDVLK-----REKELLEQELIQLEKSMLEKADSSC : 174  
 At2g22430 : ----KVKLAQELGLQPRQVAVVWFQNRARRWTKQLEHSDYDVLK-----REKELLEQELIQLEKSMLEKADSSC : 174  
 At5g65310 : ----KVKLAQELGLQPRQVAVVWFQNRARRWTKQLEHSDYDVLK-----REKELLEQELIQLEKSMLEKADSSC : 174  
 At1g69780 : ----KVKLAQELGLQPRQVAVVWFQNRARRWTKQLEHSDYDVLK-----REKELLEQELIQLEKSMLEKADSSC : 174  
 At1g26960 : ----KLELARALGLQPRQVAVVWFQNRARRWTKQLEHSDYDVLK-----REKELLEQELIQLEKSMLEKADSSC : 174  
 CT571261\_1 : ----KMQLARALNLQPRQVAVVWFQNRARRWTKQLEHSDYDVLK-----REKELLEQELIQLEKSMLEKADSSC : 174  
 AC136974\_2 : ----KVQLAKALGLQPRQVAVVWFQNRARRWTKQLEHSDYDVLK-----REKELLEQELIQLEKSMLEKADSSC : 174  
 TC103795 : ----KTKLAKDLGLQPRQVAVVWFQNRARRWTKQLEHSDYDVLK-----REKELLEQELIQLEKSMLEKADSSC : 174  
 At5g15150 : ----KMQLAKALGLQPRQVAVVWFQNRARRWTKQLEHSDYDVLK-----REKELLEQELIQLEKSMLEKADSSC : 174  
 At3g01220 : ----KTQLAKALGMQPRQVAVVWFQNRARRWTKQLEHSDYDVLK-----REKELLEQELIQLEKSMLEKADSSC : 174  
 CR954197\_2 : ----KVQLAKELGLQPRQVAVVWFQNRARRWTKQLEHSDYDVLK-----REKELLEQELIQLEKSMLEKADSSC : 174  
 TC100666 : ----KTKLAKDLGLQPRQVAVVWFQNRARRWTKQLEHSDYDVLK-----REKELLEQELIQLEKSMLEKADSSC : 174  
 TC94592 : ----KTQLAKKLGLQPRQVAVVWFQNRARRWTKQLEHSDYDVLK-----REKELLEQELIQLEKSMLEKADSSC : 174  
 At3g01470 : ----KTQLAKKLGLQPRQVAVVWFQNRARRWTKQLEHSDYDVLK-----REKELLEQELIQLEKSMLEKADSSC : 174  
 At4g37790 : ----KQALARQLNLRPRQVAVVWFQNRARRWTKQLEHSDYDVLK-----REKELLEQELIQLEKSMLEKADSSC : 174

K 6 Lg6qprQ6a6WFQN44aR K q e y L 1 6

\* 260 \* 280 \* 300 \* 320  
 CR962121\_7 : IQLRREP-----NSSSTSSISQFMEVVDPPQFHD-EFEVNHINYDD----- : 188  
 CR962121\_5 : IQLRREPFEVVTSSSSSTSSMSQSVVVDPPFLG-EFGVDNGYD----- : 200  
 At4g36740 : IQLRAERFEGGSSNSPISSSVSVEAN-ETPPFGDYKVGDDGDDYDH----- : 195  
 At2g18550 : IQLRAKRVGGLTNSNPISSSVTIEANHTTTPFFGDYDIFGFDGEADEN----- : 202  
 At5g66700 : IRKLSERLEEMPTNSS-SSLSVVEAN-----NAPTFELAPETNYN----- : 206  
 Tl\_Pisum : RTQTFGDETVESPLEGLGWREIEGYKYPNSHNQGGSTSSIIQA----- : 205  
 Tl\_Lens\_cu : RTQTFGDETVESPLEGLGWREIEGYEYPNSHNQGGSTSSIIQA----- : 205  
 Tl\_Lathyrus : RTQTFGDETVESPLEGLGWREIEGYEYPNSHNQGGSTSSIIQA----- : 205  
 Tl\_Vicia\_n : RTQTFGDETVESPLEGLGWREIEGYNPYPSTYNQGGSTSSIIQA----- : 205  
 Tl\_Vicia\_s : RTQAFQDETVESPLEGLGWREIEGYNPYPSCYNQGGSTSSIIQA----- : 205  
 AC139525\_2 : CGRMQGYTTEMSVEETETVESTSEALRCSNREVKGIHQQLNI----- : 198  
 At5g03790 : KKQISAGTIKVSQEE-DTVEISSVVVAHPRTEENMANQITGGNQ----- : 215  
 At2g36610 : KKKQ-----TWEKACS----- : 185  
 At2g46680 : EERQCSGDQAVVALSSTHSENEENRRRKPPEEVRPEMEMKDDKGHHGVMCDHHDYEDDDNG-----YS : 198  
 At3g61890 : KHHECCDQGLLSSST--ESHNG-----KSEPEGRLDQG--SVLCNDGDYN----- : 175  
 AC174358\_2 : SQSSSQVKEAKSMESASENGGRNK-----CEAEVKPSPSMERSEHVLVDLSD-----D : 185  
 At1g27050 : SVQNFDFTFKQVDLLKLEKLMQENLETQSIERKRLGEEGSSVKSDNTQYSEEGLENQYSFP-----EL : 234  
 At5g53980 : -----QDELKRANQLALFTNQSDPVDNSNLGSCDEHDH----- : 131  
 AC145165\_1 : -EEKST---INVLVKEELTMELESCDEDKHN-----PSSETSNPSSSEKDHLDYDICIINNNDVIGGE-----TS : 217  
 TC106805 : -QENTTTESDVCVKEELITLQ--ESENT---ASDETAIILRSDSKD-LNNDCKFKNGDGV-----A : 205  
 CU024864\_1 : -VESNE-----LEKEVECPISRGIERGGS-----ESNSSGIIKEES-----NVDSMPMCFNGS----- : 203

At4g40060 : -EEDNNNKAITEG---VKEEVHKTDISI---PSSPLQFLEHSSGFNYRRSFTDLRDLPL----- : 210  
 At2g22430 : -EEEEENNAAVTESDISVKEEVVSLPEKITEAPSSPPQFLEHSDGLNRY-SFTDLRDLPL-----KA : 226  
 At5g65310 : GIENGALKAVEANQSVMANNEVLELSHRS--PSPPHIPTDAPTSELA---FEMFSIFP----- : 229  
 At1g69780 : INLNKE-TEGSCSN-RSDNSSDNLRLDINSTAPPSNDSTLTGGHPPPPQTVGRHFFPPSPATA----- : 245  
 At1g26960 : INLNKE-TEGSCSD-RSENISGDIR-----PPEIDSQFALGHPP----- : 208  
 CT571261\_1 : INLNKE-TEGSSSN-RSENSS-EIKLDMRTPASDPSLSTHQHTTS-----RTFFPPS---A----- : 228  
 AC136974\_2 : KYLMKE-TEGSWSN-GSDNSL-NINLDSLRTQALNSSVSSQNGRNL-----ISLLPTSLN----- : 234  
 TC103795 : ISLKKE-NEGSWSN-GSDNSS-DMNLDLRT-----PNSLK----- : 218  
 At5g15150 : AKIKREFAEASWSNNGSTENNHNNSSD-----ANHVSMIKDLFPS----- : 256  
 At3g01220 : NIVKRE-AEASWSNNGSTENSSDINLEMPRETIITHTVNTIKDLFPS----- : 232  
 CR954197\_2 : --KVNSKSSPEAINSFPNNIDPMDIISITSENGSKMSLPN-MVLKCKQEDANSKSDVLDSDSPHCNDG----NNLSS : 263  
 TC100666 : EGKFKQGESETKEFLKEPTINKPLVDSVSEGEKSLIVEASNNNNNNKLEDISSARSDILDCESPRYTDCVLETCDSSY : 278  
 TC94592 : --QAKDMLEELPSEKKADPLVDIAQIFSIKVDHMSGSGVGS----AVVDESSPRVVGVIIVDSVDSYFPADNYAGCVAPI : 240  
 At3g01470 : --KQETANEPPQVPEPNQLDPVYINAAAIKTEDRLSSGSGVGS----AVLDDAP----QLLSDCSYFPS-----IVPI : 231  
 At4g37790 : MHMPAATLTMCPSCERLGGGGVGGDTTAVDEETAKGAFSIVTKP----- : 265

CR962121\_7 : \* 340 \* 360 \* 380 \* 400 : 204  
 CR962121\_5 : -----VFFMPDATYYFNGQE-W : 216  
 At4g36740 : -----LFYVPVPENSYIDEAE-W : 211  
 At2g18550 : -----LLYSP---DYIDGLD-W : 215  
 At5g66700 : -----IPFYMLDNNYLQSMMEY : 223  
 Tl\_Pisum : -----AEGYINSSFIVEDFDS : 221  
 Tl\_Lens\_cu : -----AEGYMNNSFIVEDFDS : 221  
 Tl\_Lathyrus : -----AEGYINSSFIVEDFDS : 221  
 Tl\_Vicia\_n : -----AEGYINNSFIVEDFDS : 221  
 Tl\_Vicia\_s : -----AEGYINSSFIVEDFDS : 221  
 AC139525\_2 : -----DEG--NCSFNLEDYNI : 212  
 At5g03790 : -----VYQYNNPMLVASSGW : 231  
 At2g36610 : ----- : -  
 At2g46680 : NNIKREYFGGFEEEPDH-----LMNIVEPAD-SCLTSSDDW : 233  
 At3g61890 : NNIKTEYFG-FEEETDHE-----LMNIVEKADDSCLTSSSENW : 211  
 AC174358\_2 : TSIKVEYFG--LEDETG-----LMNFAEHAD-GSLTSPEDW : 218  
 At1g27050 : AVLGFFYDPTLTASNLRQ-----EPLKVTCADQMTQIQISDV : 271  
 At5g53980 : -----QVVVFDELYACFVSNG : 147  
 AC145165\_1 : SLFPVLDKDGSSDSDS-----SAISSSGVLQSQHLLLSLSP-----ESSS---MNCFYQKSYHVKMEEHNF : 275  
 TC106805 : SLFPADFKDGSSDSDSSAILNEESNAAISSSGVLQN-HNFLMSPGSSSLKFCNCESSSPSSMNCQFQTQF-VKMEEHNF : 284  
 CU024864\_1 : --LPSSMINLVHYYDS-----RGSQEN-----VFQNF-MRMEEQNF : 237  
 At4g40060 : --NSTVVEAGSSDSCD-----SSAVLNDETSSDNGRLT-----PPVTVTGGSFQFVKTEQTEDHEDF : 266  
 At2g22430 : AASSFAAAAGSSDSSD-----SSALLNEESS-NVTVA-----APVTVPGGNFQFVKMEQTEDHEDF : 283  
 At5g65310 : --RTENFRDDPADSSD-----SSAVLNDEEYSPNTVEAAG-----AVAATTVMESTMGCFSSQFVKMEEHEDL : 288  
 At1g69780 : -TTTTTMMQFFQNSSSG-----QSMVKEEN-SISNMFCG : 277  
 At1g26960 : ---TTTTMQLFQNSSSE-----QRMVKEEN-SISNMFCG : 238  
 CT571261\_1 : -RPSSGIAQLFQTSSRPEI-----QCQKIDQMVKEE--SLSNMFCG : 266  
 AC136974\_2 : ---PNNIPQLLQFTSRP-----DIQDE--NFSSMFHN : 261  
 TC103795 : ---PTSMTQLLQCSSKS-----DLQDE--SFCNMFNN : 245  
 At5g15150 : ---SIRSATATTSTHID-----HQIVDQDQGFQFCNMFG : 288  
 At3g01220 : ---SIRSS-AHDDDHQON-----HEIVQEES--LCNMFG : 261  
 CR954197\_2 : FIEPT-DSDFSQDEEDNDN-----LSHNLTLPLCLPKVEDVCY : 300  
 TC100666 : VFEPEYQSDLSQDEED-----HNLLPPYIFTKLEDVNY : 311  
 TC94592 : ERVQSEEDDGDGRN-----YFDVVFVASETEQHNNH : 271  
 At3g01470 : Q-DNSNASDHDNDRSC-----FADVFPVPTTSPSHDH : 261  
 At4g37790 : -----RFYNPFTN : 273

CR962121\_7 : \* 420 \* 440 \* 460 \* 480 : 207  
 CR962121\_5 : ISLYM----- : 221  
 At4g36740 : MSLYI----- : 216  
 At2g18550 : MSQFM----- : 220  
 At5g66700 : DGLYV----- : 228  
 Tl\_Pisum : VS-LHQECHWPELP---YYP----- : 237  
 Tl\_Lens\_cu : VS-LHQECHWPELP---YFP----- : 237  
 Tl\_Lathyrus : VS-LHQECHWPELP---YYP----- : 237  
 Tl\_Vicia\_n : VS-LHQECHWPELP---YYP----- : 237  
 Tl\_Vicia\_s : VS-LHQECHWPELP---YYP----- : 237  
 AC139525\_2 : NNNVPLLPYWPAAVPYNYHP----- : 232  
 At5g03790 : PS-----YP----- : 235  
 At2g36610 : ----- : -  
 At2g46680 : RGFKSDTTLLDQSSNNYP-WRDFWS----- : 258

```

At3g61890 : GGFNSDS--LLDQSSSNYPNWWFWS----- : 235
AC174358_2 : SAFESND--LLGQSSCDYQ-WWDFWS----- : 241
At1g27050 : TEPASSAHKKIEVTRSSSMSRKRDKPYTNRHTPARISKRRRPWAPSSSEHDEIIDKPI TKPPPPALVVMGLPANCSVLE : 352
At5g53980 : HGSSSTSWV----- : 156
AC145165_1 : LSADEACNFFSDEQAPTLQWYCP-DQWS----- : 302
TC106805 : LSADETCDFFSDEQPPTLQWYCS-EEWN----- : 311
CU024864_1 : LSNSELSFFSVDQSPTL----- : 255
At4g40060 : LSGEEACGFFSDEQPPSLHWYSASDHWT----- : 294
At2g22430 : LSGEEACEFFSDEQPPSLHWYSTVDHWN----- : 311
At5g65310 : FSGEEACKLFADNE---QWYCS-DQWNS----- : 312
At1g69780 : MDDHS--GFWPWLDQQQYN----- : 294
At1g26960 : IDDQS--GFWPWLDQQQYN----- : 255
CT571261_1 : MDDQA--GFWPWLEQQHFN----- : 283
AC136974_2 : IDEHQ--NLWPWA----- : 272
TC103795 : IDEQQ--SLWPWTDHQHQFR----- : 264
At5g15150 : IDETTSASYWAWPDQQQHHNHHQFN----- : 314
At3g01220 : IDETTPAGYWAWSDPNHNNH-HHQFN----- : 286
CR954197_2 : DDPHENS CNFGFPVEDQTFCFWPY----- : 324
TC100666 : SDPPHNSTSYGFQEEDHHQALWPWSY----- : 337
TC94592 : EE-----GEALNWWGNMYVA----- : 287
At3g01470 : H-----GESLAFWGW----- : 272
At4g37790 : PSAAC----- : 278

```

```

*          500          *          520          *          540          *          560
CR962121_7 : ----- : -
CR962121_5 : ----- : -
At4g36740 : ----- : -
At2g18550 : ----- : -
At5g66700 : ----- : -
Tl_Pisum : ----- : -
Tl_Lens_cu : ----- : -
Tl_Lathyrus : ----- : -
Tl_Vicia_n : ----- : -
Tl_Vicia_s : ----- : -
AC139525_2 : ----- : -
At5g03790 : ----- : -
At2g36610 : ----- : -
At2g46680 : ----- : -
At3g61890 : ----- : -
AC174358_2 : ----- : -
At1g27050 : LKSRFEIYGSISRIRIHKD GIGSVSYRTAESAEAAIAGSHEPSFGISIDSKKLEVVWATDPLVKWKEGVTAGEGKERTSSF : 433
At5g53980 : ----- : -
AC145165_1 : ----- : -
TC106805 : ----- : -
CU024864_1 : ----- : -
At4g40060 : ----- : -
At2g22430 : ----- : -
At5g65310 : ----- : -
At1g69780 : ----- : -
At1g26960 : ----- : -
CT571261_1 : ----- : -
AC136974_2 : ----- : -
TC103795 : ----- : -
At5g15150 : ----- : -
At3g01220 : ----- : -
CR954197_2 : ----- : -
TC100666 : ----- : -
TC94592 : ----- : -
At3g01470 : ----- : -
At4g37790 : ----- : -

```

```

*          580          *          600          *          620
CR962121_7 : ----- : -
CR962121_5 : ----- : -
At4g36740 : ----- : -
At2g18550 : ----- : -
At5g66700 : ----- : -
Tl_Pisum : ----- : -
Tl_Lens_cu : ----- : -

```

```

Tl_Lathyru : ----- : -
Tl_Vicia_n : ----- : -
Tl_Vicia_s : ----- : -
AC139525_2 : ----- : -
At5g03790 : ----- : -
At2g36610 : ----- : -
At2g46680 : ----- : -
At3g61890 : ----- : -
AC174358_2 : ----- : -
At1g27050 : SSKLLRPVMPLRKHGRSSRLASAIVNPRSDNTKGISGDGGISSPATTSEVKQRNIVTYDDIV : 495
At5g53980 : ----- : -
AC145165_1 : ----- : -
TC106805 : ----- : -
CU024864_1 : ----- : -
At4g40060 : ----- : -
At2g22430 : ----- : -
At5g65310 : ----- : -
At1g69780 : ----- : -
At1g26960 : ----- : -
CT571261_1 : ----- : -
AC136974_2 : ----- : -
TC103795 : ----- : -
At5g15150 : ----- : -
At3g01220 : ----- : -
CR954197_2 : ----- : -
TC100666 : ----- : -
TC94592 : ----- : -
At3g01470 : ----- : -
At4g37790 : ----- : -

```

**Supplemental Table 1.** Comparison of species richness in legume lineages composed of climbing plants and sister non-climbing groups. Adapted from (Gianoli, 2004) with species numbers estimated according to (Lewis et al., 2005).

| Climbing plant taxa         | number of spp. | sister group (non-climbing) | number of spp. |
|-----------------------------|----------------|-----------------------------|----------------|
| Papilionoideae              |                |                             |                |
| Fabeae                      | 330            | Trifolieae                  | 250            |
|                             |                |                             |                |
| Papilionoideae              |                |                             |                |
| Millettoid/phaseoloid clade | 2647           | Indigofereae                | 768            |

**Supplemental Table 2.** Confirmed *tendrill-less* alleles

| Line no.  | Allele no.                      | Background         | Author of allele                             | Mutagen           | Isogenic or not | Mutation       |
|-----------|---------------------------------|--------------------|----------------------------------------------|-------------------|-----------------|----------------|
| Jl 1194   | wt                              | Marx isoline       |                                              |                   | yes             |                |
| Jl 1197   | <i>tl-w</i> , ( <i>tl-1</i> )   |                    | (de Vilmorin, 1910)                          | spontaneous       |                 | 3 bp insertion |
| Jl 31     | wt                              | Witham Wonder      |                                              |                   | no              |                |
| Jl 32     | <i>tl-pet</i> , ( <i>tl-2</i> ) |                    | (Lamm, 1957)                                 | spontaneous       |                 | SNP            |
|           | wt                              | Sprint x WL1018 F1 |                                              |                   | not analysed    |                |
|           | <i>tl-x</i> , ( <i>tl-3</i> )   |                    | (Gorel et al., 1994; Berdnikov et al., 1999) | 7 krad gamma rays |                 | not analysed   |
|           | wt                              | SGE                |                                              |                   | not analysed    |                |
| SGE0812   | <i>tl-na</i> , ( <i>tl-4</i> )  |                    | (Rozov, 2006)                                | EMS               |                 | not analysed   |
| Jl 2822   | wt                              | Jl15xJl399, RIL 39 |                                              |                   | yes             |                |
| FN 1081/6 | <i>tl-5</i>                     |                    | this paper                                   | FN 20 Gy          |                 | deletion       |
| Jl 2822   | wt                              | Jl15xJl399, RIL 39 |                                              |                   | yes             |                |
| FN        | <i>tl-6</i>                     |                    | this paper                                   | FN 20 Gy          |                 | deletion       |



|              |              |                       |                                     |                                       |                 |                     |
|--------------|--------------|-----------------------|-------------------------------------|---------------------------------------|-----------------|---------------------|
| 1132/1       |              |                       |                                     |                                       |                 |                     |
| Jl 2822      | wt           | Jl15xJl399,<br>RIL 39 |                                     |                                       | yes             |                     |
| FN<br>1167/3 | <i>tl-7</i>  |                       | this paper                          | FN 20 Gy                              |                 | deletion            |
| Jl 2822      | wt           | Jl15xJl399,<br>RIL 39 |                                     |                                       | yes             |                     |
| FN<br>1347/6 | <i>tl-8</i>  |                       | this paper                          | FN 20 Gy                              |                 | deletion            |
| Jl 2822      | wt           | Jl15xJl399,<br>RIL 39 |                                     |                                       | yes             |                     |
| FN<br>1484/1 | <i>tl-9</i>  |                       | this paper                          | FN 20 Gy                              |                 | deletion            |
| Jl 2822      | wt           | Jl15xJl399,<br>RIL 39 |                                     |                                       | yes             |                     |
| FN<br>2086/3 | <i>tl-10</i> |                       | this paper                          | FN 20 Gy                              |                 | deletion            |
| Jl 2822      | wt           | Jl15xJl399,<br>RIL 39 |                                     |                                       | yes             |                     |
| FN<br>1770/4 | <i>tl-11</i> |                       | this paper                          | FN 20 Gy                              |                 | Not<br>analysed     |
| Jl 516       | wt           | Maro                  |                                     |                                       | yes             |                     |
| Jl 1373      | <i>tl-12</i> |                       | this paper                          | spontaneous                           |                 | 1908 bp<br>deletion |
| Jl 2224      | wt           | Ramonski 77           |                                     |                                       | yes             |                     |
| Jl 3128      | <i>tl-13</i> | I/101                 | (Vassileva,<br>1979), this<br>paper | 20 krad<br>gamma rays,<br>1725rad/min |                 | deletion            |
|              | wt           | Kazanski              |                                     |                                       | Not<br>analysed |                     |

|           |              |         |                               |                                 |                      |              |
|-----------|--------------|---------|-------------------------------|---------------------------------|----------------------|--------------|
|           | <i>tl-14</i> | VIII/11 | (Vassileva, 1979), this paper | 20 krad gamma rays, 2000rad/min |                      | Not analysed |
|           | wt           | Iregi-5 |                               |                                 |                      | Not analysed |
|           | <i>tl-15</i> | V/10    | (Vassileva, 1979), this paper | 5 krad gamma rays, 49rad/min    |                      | Not analysed |
| Jl 3131   | wt           | Iregi-5 |                               |                                 | very closely related |              |
| Jl 3130   | <i>tl-16</i> | V/243   | (Vassileva, 1979), this paper | 0.25 krad FN + 0.2 % EMS        |                      | deletion     |
| 5839      | wt           | Torsdag |                               |                                 |                      |              |
| MC1a/1    | <i>tl-17</i> |         | this paper                    | EMS                             | yes                  | SNP          |
| Jl 3253   | wt           | Cameor  |                               |                                 |                      |              |
| M3 4092-1 | <i>tl-18</i> |         | this paper                    | EMS                             | yes                  | SNP          |

**Allelism notes.** *tl-1* is the original de Vilmorin mutant, known as *tl-white*, or *tl-w*, after the listing in (White, 1917). Allelism tests for *tl-pet* (Lamm, 1957) and *tl-na* (Rozov, 2006) were conventional crossings to *tl-w*, where the authors reported a tendril-less F1 progeny plant. Homozygous lethal *tl-x* (Gorel et al., 1994; Berdnikov et al., 1999) was determined to be allelic by the authors because it was generated by mutagenesis of a heterozygous *Tl/tl-1* F1 seed, which yielded a plant with tendril-less branches ie. branches “homozygous” at the *tl* locus *tl-w/tl-x*. Conventional allelism tests were done for all JIC FN *tl* mutants, either prior to molecular analysis, as crosses to *tl-w* line Jl 1197 (*tl-5*, *tl-6*, *tl-7*, *tl-8*, *tl-9*, *tl-10*), or later, as a cross to *tl-w* line Jl 1201 (*tl-11*). Others listed were found to be allelic after molecular

analysis, either by sequencing (*tl-1* confirmed, *tl-12*, *tl-17* and *tl-18*), or by identification as a deletion mutant by absence of a *Tl* PCR marker (Vassileva alleles *tl-13* and *tl-16* and JIC FN alleles, *tl-5*, *tl-6*, *tl-7*, *tl-8*, *tl-9*, *tl-10* confirmed). Vassileva alleles *tl-14* (VIII/11) and *tl-15* (V/10) were crossed to *tl-13* (I/101) and F1 progeny were reported as tendrill-less (Vassileva, 1979), therefore our molecular identification of the *tl-13* allele also confirms alleles *tl-14* and *tl-15*.

**References not in the main text:**

- Berdnikov, V.A., Gorel, F.L., Bogdanova, V.S., Kosterin, O.E., Trusov, Y.A., and Rozov, S.M.** (1999). Effect of a substitution of a short chromosome segment carrying a histone H1 locus on expression of the homeotic gene *Tl* in heterozygote in the garden pea *Pisum sativum* L. Genet. Res. **73**: 93-109.
- Gorel, F.L., Berdnikov, V.A., and Temnykh, S.V.** (1994). A deletion covering the *Tl* locus in *Pisum sativum*. Pisum Genetics **26**: 16-17.
- Rozov, S.** (2006). A new allele at the *Tl* locus - *tl<sup>na</sup>*. Pisum Genetics **38**: 15-16.
- White, O.E.** (1917). Studies of inheritance in *Pisum*. II. The present state of knowledge of heredity and variation in peas. Proc. Am. Philos. Soc. **56**: 487-588.

**Supplemental Table 3.** Epistasis of *uni* over *tl*. T-test of unifoliolate plants segregating in combined F2 populations; FN1210/1 (*uni/uni*) x FN1081/6 (*tl/tl*), FN1210/1 (*uni/uni*) x FN1132/1 (*tl/tl*) and FN1210/1 (*uni/uni*) x FN2086/3 (*tl/tl*), n = 188. Results for plants with tendrils are not included in the table. Leaflet counts were made when plants were four weeks old. TI marker scores: 1 = PCR band present, corresponding to *Tl Tl* homozygotes and *Tl tl* heterozygotes, 0 = PCR band absent, corresponding to homozygous *tl tl* deletion mutants.

|                 |     |     |     |     |     |     |     |     |     |     |     |     |     |     |
|-----------------|-----|-----|-----|-----|-----|-----|-----|-----|-----|-----|-----|-----|-----|-----|
| plant phenotype | uni |
| TI marker score | 0   | 0   | 0   | 0   | 0   | 0   | 0   | 0   | 0   | 0   | 0   | 0   | 0   | 0   |
| Total no.       |     |     |     |     |     |     |     |     |     |     |     |     |     |     |
| leaflets/plant  | 9   | 8   | 8   | 9   | 8   | 10  | 8   | 9   | 8   | 9   | 8   | 8   | 8   | 8   |
|                 |     |     |     |     |     |     |     |     |     |     |     |     |     |     |
| plant phenotype | uni |
| TI marker score | 1   | 1   | 1   | 1   | 1   | 1   | 1   | 1   | 1   | 1   | 1   | 1   | 1   | 1   |
| Total no.       |     |     |     |     |     |     |     |     |     |     |     |     |     |     |
| leaflets/plant  | 8   | 9   | 9   | 8   | 8   | 8   | 9   | 10  | 8   | 10  | 9   | 8   | 9   | 8   |
|                 |     |     |     |     |     |     |     |     |     |     |     |     |     |     |
| plant phenotype | uni |
| TI marker score | 1   | 1   | 1   | 1   | 1   | 1   | 1   | 1   | 1   | 1   | 1   | 1   | 1   | 1   |
| Total no.       |     |     |     |     |     |     |     |     |     |     |     |     |     |     |
| leaflets/plant  | 8   | 8   | 8   | 9   | 9   | 9   | 8   | 9   | 9   | 8   | 9   | 9   | 8   | 7   |
|                 |     |     |     |     |     |     |     |     |     |     |     |     |     |     |
| plant phenotype | uni |     |     |     |     |
| TI marker score | 1   | 1   | 1   | 1   | 1   | 1   | 1   | 1   | 1   | 1   |     |     |     |     |
| Total no.       |     |     |     |     |     |     |     |     |     |     |     |     |     |     |
| leaflets/plant  | 10  | 8   | 8   | 8   | 9   | 7   | 9   | 10  | 8   | 8   | 9   |     |     |     |

|                               |       |
|-------------------------------|-------|
| <b>t-test, leaflet number</b> |       |
| n (tot)                       | 53    |
| mean                          | 8.51  |
| variance                      | 0.52  |
| Stdev                         | 0.72  |
| SEM                           | 0.10  |
| popvar                        | 0.55  |
| exp var(mean) pop n=39        | 0.01  |
| exp var(mean) pop n=14        | 0.04  |
| est var diff (mean)           | 0.05  |
| obs diff                      | 0.11  |
| <b>t</b>                      | 0.48  |
| <b>P</b>                      | 0.631 |
| <b>v</b>                      | 51    |

**Supplemental Table 4.** Primer and adapter sequences

| Primers and adapters used in marker screening: |                                        |
|------------------------------------------------|----------------------------------------|
| <i>Pst</i> I adapter 1                         | 5'-CTCGTAGACTGCGTACATGCA-3',           |
| <i>Pst</i> I adapter 2                         | 5'-TGTACGCAGTCTAC-3'.                  |
| <i>Mse</i> I adapter 1                         | 5'-GACGATGAGTCCTGAG-3',                |
| <i>Mse</i> I adapter 2                         | 5'- TACTCAGGACTCAT-3'.                 |
| <i>Pst</i> I primer                            | 5'-GACTGCGTACATGCAG(A/C/G/T)-3',       |
| <i>Mse</i> I primer                            | 5'-GATGAGTCCTGAGTAA(A/C/G/T)-3'.       |
| Sequencing primers:                            |                                        |
| 34R9                                           | 5'-GTGTATTGACTGCATCCTTCGGTG -3'        |
| 34R8                                           | 5'-GTTAGTTGTGTATATTGATATTGAGTG -3'     |
| 34F8REV                                        | 5'-CACATGTCAATTTCAAATGAGTTAC -3'       |
| 34F7REV                                        | 5'-GCACTTCATACCACACTTCGATTC -3'        |
| TLHD5'                                         | 5'-GGAGTAGATTACACCCAAAAGAGAG -3'       |
| TLHD5'REV                                      | 5'-CTCTCTTTTGGGTGTAATCTACTCC -3'       |
| TLHDF1                                         | 5'-GATTACCGAGAGAAGAAGAAGAC -3'         |
| TLHDF2                                         | 5'-AAGAAGAATAAATTAACAAGTAACCAAG -3'    |
| 34cDNA5'                                       | 5'-GAAAATCAGAACTTCAAGAAGAGG -3'        |
| TLHD3'nest                                     | 5'-CTCACAAGCCACACACG -3'               |
| TLHD3'                                         | 5'-CGGATAATGGGAGTAGTGGAG -3'           |
| Primers used in PCR cloning experiments:       |                                        |
| TLHDcDNA5'-1                                   | 5'- GAGACAACACCCTTTGATCC -3'           |
| 34cDNA3'                                       | 5'- GTCTTCAAACGACTAATACCTAACTACTAG -3' |
| TLHD5'nest                                     | 5'-GAGAGACACTGTTTACCGTACG -3'          |
| TLHD3'nest2                                    | 5'- CAAACACCTCACAAGCCACAC-3'           |

|                                                                       |                                           |
|-----------------------------------------------------------------------|-------------------------------------------|
| RT-PCR primers:                                                       |                                           |
| oligo T primer                                                        | 5'-GACTCGAGTCGACATCG(T) <sub>17</sub> -3' |
| TLHDF1                                                                | 5'- GATTACCGAGAGAAGAAGAAGAC-3'            |
| 34F1                                                                  | 5'- GTTGAATGCTACTTGTTGATCC-               |
| PsAGO1                                                                | 5'-TTCTACCTCTGTGCTCATGCG-3'               |
| PsAGO2                                                                | 5'-CCTCGAATTTTCATGAATTGCC-3'.             |
|                                                                       |                                           |
| Quantitative PCR primers:                                             |                                           |
| PsTIF                                                                 | 5'-CTAGGTGGAAGACTAAGCAGC-3'               |
| PsTIsparR                                                             | 5'-GCTTTTCCTTCAACACCATAACCTC-3'.          |
| PsActF                                                                | 5'-CACAATTGGCGCTGAAAGAT-3'                |
| PsActR                                                                | 5'-TAATTGAGTTAAATGTCGTCTCATGGAT-3'        |
| RACE PCR primers:                                                     |                                           |
| 34F6                                                                  | 5'-GAACAAAGGGTACTGTGGTATCAG -3'           |
| 34F6adj                                                               | 5'-AGAAGAACCTGGAGGAGGAAC-3'               |
| 34PstextR1                                                            | 5'- GATACATCAACAGTTCTTTCATTG-3'           |
|                                                                       |                                           |
| Primers for probe amplification for RNA <i>in situ</i> hybridization: |                                           |
| 34cDNA5'                                                              | 5'- GAAAATCAGAACTTCAAGAAGAGG-3'           |
| 34cDNA3'                                                              | 5'- GTCTTCAAACGACTAATACCTAACTACTAG-3'     |
